# Supplementary material
Source: HighWire-hosted journal article supplement (https://erj.ersjournals.com/content/50/4/1700853)
Supplement: inline-supplementary-material-1 [file inline-supplementary-material-1.pdf]

**Online supplement for:**

**Impact and Associations of Eosinophilic Inflammation in COPD: Analysis of the AERIS Cohort**

Viktoriya L Kim<sup>1,2,3</sup>, Ngaire A Coombs<sup>4</sup>, Karl J Staples<sup>1,2,5</sup>, Kristoffer K Ostridge<sup>1,2</sup>, Nicholas P Williams<sup>1,2</sup>, Stephen A Wootton<sup>3</sup>, Jeanne-Marie Devaster<sup>6</sup>, Emmanuel Aris<sup>6</sup>, Stuart C Clarke<sup>2,5</sup>, Andrew C Tuck<sup>7</sup>, Simon C Bourne<sup>2†</sup>, Tom MA Wilkinson<sup>1,2,5</sup> on behalf of the AERIS Study Group\*.

## **Methods**

### ***Study design and study population***

The Acute Exacerbation and Respiratory InfectionS in COPD (AERIS) study is a prospective, observational cohort study based at University Hospital Southampton (UHS), registered with ClinicalTrials.gov (NCT01360398). The study protocol has been published previously.<sup>1</sup> We describe an analysis of the first year of a two-year longitudinal epidemiological study which assessed the nature of infection and inflammation in the aetiology of AECOPD. Patients aged 40–85 years with a confirmed diagnosis of COPD, were recruited from UHS and referring practices from June 2011 to June 2012. AERIS was conducted in accordance with the Declaration of Helsinki and Good Clinical Practice, and was approved by the Southampton and South West Hampshire Research Ethics Committee. All participants provided written informed consent. The protocol summary is available at [www.gsk-clinicalstudyregister.com](http://www.gsk-clinicalstudyregister.com) (study identifier, 114378). Full inclusion and exclusion criteria have been published previously.<sup>1</sup>

We report results of a secondary analysis focusing on eosinophilic inflammation for subjects followed over one year.

### ***Procedures***

Patients were followed monthly in the stable state and reviewed within 72 hours of onset of AECOPD symptoms. Exacerbations were detected using daily electronic diary cards. The definition of AECOPD and definitions of severity categories were described previously<sup>1,2</sup>.

Venous blood was taken for measurement of full blood count, serum C reactive protein (CRP), serum fibrinogen and serum procalcitonin (PCT) at enrolment and then at quarterly visits over the following year. FBC, CRP and fibrinogen analyses were performed by the

University Hospital Southampton Haematology laboratory. Sputum samples were obtained either by saline induction or spontaneous expectoration and were processed according to standard methods, as previously described<sup>3</sup>. Briefly, sputum was solubilised with 0.1% dithiothreitol to liberate the cells from mucus. The resulting cells were resuspended in PBS and cytopsin slides (Thermo Shandon Ltd, Runcorn, UK) were prepared. Differential cell counts were performed manually on cytopsin slides stained with rapid Romanowsky stain (Raymond Lamb Ltd, Eastbourne, UK). Differential cell counts were obtained from a 400 cell count. Sputum samples were processed by conventional microbiology methods for identification of potentially pathogenic microorganisms (PPM) focusing on *H. influenzae* (HI), *M. catarrhais* (MC), *S. pneumoniae* (SP), *S. aureus* (SA) and *P. aeruginosa* (PA). Sputum samples were also processed for detection of respiratory viruses by PCR analysis. Only sputum samples with <30% squamous cells, and good quality spirometry samples (A or B) were considered in the analyses.

### ***Criteria for eosinophilic groups and seasonality***

Eosinophilic inflammation was defined as sputum eosinophils >3% and blood eosinophils  $\geq 2\%$  in line with previous studies.<sup>4-8</sup> To investigate the stability of blood eosinophilic inflammation over time we divided subjects into three groups: predominantly (PE), intermittent (IE) and rarely (RE) eosinophilic. Only those subjects who had at least 3 (out of 5 potential) stable visits with valid blood results over 12 months were included in the group analyses (n=99). The PE group was defined as blood eosinophils ( $\geq 2\%$ ) at either all visits, or all but 1 visits where the blood eosinophils were <2%; the RE group was defined as blood eosinophils <2% at all visits, or all but 1 visit where the blood eosinophils were  $\geq 2\%$ ; the IE group was defined when none of the abovementioned criteria were met.

To investigate an impact of seasonality on exacerbations we divided the year into 2 seasons,

each containing six months: one containing exacerbation visits occurring in winter and the other summer months. For the simplicity we defined them as winter (October-March) and summer (April – September) seasons.

### ***Statistical analysis***

Bivariate analyses testing for differences between eosinophilic groups were conducted using Kruskal-Wallis, ANOVA, Chi-Square, or Fisher's Exact test, as appropriate. All tests were two-tailed. Receiver Operator Curves (ROC) were used to assess the predictive ability of different cut offs to correctly identify presence of sputum eosinophilic inflammation. Intra-class correlations were used to assess the reliability of measures within individuals over time. As subjects contributed differing numbers of exacerbations over the study period, some subjects would be represented multiple times in analyses exploring outcomes at exacerbation. To counter this, descriptive analyses were conducted for only the first exacerbation occurring to each subject, and multivariate analyses with binary outcomes (presence/absence of different conditions at exacerbation) were conducted using conditional logistic regression, including the subject number as a random effect. SPSS (version 22) was used for all analyses with the exception of intra-class correlation coefficients (ICC) and conditional logistic regression, which were conducted using STATA (version 14). All of these analyses should be considered post hoc as they were not pre-specified in the AERIS statistical analysis plan.

## References

1. Bourne S, Cohet C, Kim V, Barton A, Tuck A, Aris E, Mesia-Vela S, Devaster JM, Ballou WR, Clarke S, Wilkinson T. Acute Exacerbation and Respiratory Infections in COPD (AERIS): protocol for a prospective, observational cohort study. *BMJ open*. 2014;4(3):e004546.
2. Wilkinson TMA, Aris E, Bourne S, Clarke SC, Peeters M, Pascal TG, Schoonbroodt S, Tuck AC, Kim V, Ostridge K, Staples KJ, Williams N, Williams A, Wootton S, Devaster JM, Group AS. A prospective, observational cohort study of the seasonal dynamics of airway pathogens in the aetiology of exacerbations in COPD. *Thorax*. 2017; in press [<http://dx.doi.org/10.1136/thoraxjnl-2016-209023>].
3. Vignola AM, Rennar SI, Hargreave FE, Fah JV, Bonsignore MR, Djukanovic R, Sterk PJ. Standardised methodology of sputum induction and processing. Future directions. *Eur Respir J Suppl*. 2002;37:51s-5s.
4. Pizzichini E, Pizzichini MM, Gibson P, Parameswaran K, Gleich GJ, Berman L, Dolovich J, Hargreave FE. Sputum eosinophilia predicts benefit from prednisone in smokers with chronic obstructive bronchitis. *American journal of respiratory and critical care medicine*. 1998;158(5 Pt 1):1511-7.
5. Brightling CE, Monteiro W, Ward R, Parker D, Morgan MD, Wardlaw AJ, Pavord ID. Sputum eosinophilia and short-term response to prednisolone in chronic obstructive pulmonary disease: a randomised controlled trial. *Lancet*. 2000;356(9240):1480-5.
6. Bafadhel M, McKenna S, Terry S, Mistry V, Reid C, Haldar P, McCormick M, Haldar K, Keadze T, Duvoix A, Lindblad K, Patel H, Rugman P, Dodson P, Jenkins M, Saunders M, Newbold P, Green RH, Venge P, Lomas DA, Barer MR, Johnston SL, Pavord ID, Brightling CE. Acute exacerbations of chronic obstructive pulmonary disease: identification of biologic clusters and their biomarkers. *American journal of respiratory and critical care medicine*. 2011;184(6):662-71.
7. Siva R, Green RH, Brightling CE, Shelley M, Hargadon B, McKenna S, Monteiro W, Berry M, Parker D, Wardlaw AJ, Pavord ID. Eosinophilic airway inflammation and exacerbations of COPD: a randomised controlled trial. *Eur Respir J*. 2007;29(5):906-13.
8. Pascoe S, Locantore N, Dransfield MT, Barnes NC, Pavord ID. Blood eosinophil counts, exacerbations, and response to the addition of inhaled fluticasone furoate to vilanterol in patients with chronic obstructive pulmonary disease: a secondary analysis of data from two parallel randomised controlled trials. *The Lancet Respiratory medicine*. 2015;3(6):435-42.

**Table E1.** Baseline characteristics by longitudinal blood eosinophil group over 12 months using 200 cells/uL cutoff (n=99).

|                                                          | Rarely eosinophilic (n=24) |        |        | Intermittently eosinophilic (n=12) |        |        | Predominantly eosinophilic (n=63) |        |        | P value $\Omega$ |
|----------------------------------------------------------|----------------------------|--------|--------|------------------------------------|--------|--------|-----------------------------------|--------|--------|------------------|
|                                                          | N                          | Median | (IQR)  | N                                  | Median | (IQR)  | N                                 | Median | (IQR)  |                  |
| <b>Continuous variables</b>                              |                            |        |        |                                    |        |        |                                   |        |        |                  |
| Age $\alpha$                                             | 24                         | 61.4   | (8.68) | 12                                 | 67.3   | (4.87) | 63                                | 68.4   | (8.82) | 0.002            |
| Smoking history (pack/years) $\alpha$                    | 24                         | 45.6   | (23.4) | 12                                 | 72.5   | (47.7) | 63                                | 50.5   | (27.4) | 0.017            |
| BMI                                                      | 24                         | 26.6   | (8.69) | 12                                 | 28.2   | (10.6) | 63                                | 26.3   | (4.44) | 0.437            |
| FFBM                                                     | 23                         | 43.6   | (21.2) | 12                                 | 53.7   | (19.1) | 62                                | 48.6   | (22.3) | 0.467            |
| WBC                                                      | 23                         | 7.60   | (2.50) | 12                                 | 7.35   | (1.57) | 63                                | 7.40   | (2.10) | 0.788            |
| Blood eosinophils (count)                                | 23                         | 0.10   | (0.10) | 12                                 | 0.15   | (0.10) | 63                                | 0.30   | (0.20) | NA               |
| Blood eosinophils (%)                                    | 23                         | 1.35   | (1.44) | 12                                 | 1.92   | (1.08) | 63                                | 4.05   | (3.14) | NA               |
| Blood neutrophils (count)                                | 23                         | 5.00   | (2.20) | 12                                 | 4.80   | (0.48) | 63                                | 4.70   | (1.80) | 0.330            |
| Fibrinogen                                               | 21                         | 4.70   | (1.50) | 11                                 | 4.60   | (1.30) | 56                                | 4.80   | (0.88) | 0.624            |
| CRP                                                      | 24                         | 4.00   | (6.50) | 12                                 | 5.00   | (4.75) | 63                                | 5.00   | (8.00) | 0.699            |
| Sputum eosinophils (%) $\neq$                            | 14                         | 0.33   | (2.24) | 5                                  | 1.81   | (1.78) | 46                                | 2.41   | (7.32) | 0.097            |
| Sputum neutrophils (%) $\neq$                            | 14                         | 9.77   | (65.3) | 5                                  | 45.6   | (63.3) | 46                                | 45.1   | (69.7) | 0.500            |
| FEV1 (%)                                                 | 24                         | 49.2   | (26.9) | 12                                 | 49.6   | (25.1) | 63                                | 46.4   | (23.7) | 0.736            |
| $\Delta$ FEV1(% of baseline) $\xi$                       | 17                         | 3.88   | (23.9) | 11                                 | 7.25   | (31.3) | 51                                | 5.03   | (21.6) | 0.870            |
| FEV1 reversibility (% of preBD $\Delta$ FEV1) $\epsilon$ | 23                         | 7.26   | (15.0) | 10                                 | 15.9   | (21.3) | 50                                | 12.6   | (13.3) | 0.572            |
| KCO (%)                                                  | 22                         | 75.1   | (31.9) | 12                                 | 73.0   | (26.0) | 60                                | 69.2   | (28.6) | 0.410            |
| TLCO(%)                                                  | 22                         | 65.0   | (32.0) | 12                                 | 61.9   | (27.0) | 60                                | 56.2   | (29.6) | 0.312            |
| CAT                                                      | 24                         | 15.5   | (11.0) | 12                                 | 19.0   | (12.0) | 63                                | 16.0   | (10.0) | 0.371            |
| 6MWT (distance in meters)                                | 23                         | 326    | (174)  | 12                                 | 321    | (227)  | 62                                | 326    | (166)  | 0.769            |
| Exact score                                              | 22                         | 34.0   | (16.0) | 10                                 | 35.0   | (11.0) | 51                                | 37.0   | (14.0) | 0.943            |
| Exacerbation rate in year before study                   | 24                         | 2.50   | (3.00) | 12                                 | 2.00   | (3.00) | 63                                | 2.00   | (3.00) | 0.705            |
| Exacerbation rate in first year of study                 | 24                         | 1.98   | (3.91) | 12                                 | 1.52   | (2.00) | 63                                | 2.96   | (3.91) | 0.480            |
| Eosinophilic exacerbation rate in first year of study    | 24                         | 0.00   | (0.98) | 12                                 | 0.00   | (0.99) | 63                                | 1.01   | (2.98) | <0.001           |
| Follow up (years) in first year of study                 | 24                         | 1.01   | (0.02) | 12                                 | 1.00   | (0.01) | 63                                | 1.00   | (0.02) | 0.072            |
| <b>Categorical variables</b>                             | N                          | (%)    |        | N                                  | (%)    |        | N                                 | (%)    |        |                  |
| Sex                                                      |                            |        |        |                                    |        |        |                                   |        |        |                  |
| Male                                                     | 10                         | (42%)  |        | 8                                  | (67%)  |        | 37                                | (59%)  |        | 0.297            |
| Female                                                   | 14                         | (58%)  |        | 4                                  | (33%)  |        | 26                                | (41%)  |        |                  |
| Current smoker $\gamma$ $\mu$                            |                            |        |        |                                    |        |        |                                   |        |        |                  |
| Yes                                                      | 14                         | (58%)  |        | 4                                  | (33%)  |        | 25                                | (40%)  |        | 0.233            |
| No                                                       | 10                         | (42%)  |        | 8                                  | (67%)  |        | 38                                | (60%)  |        |                  |
| Use of ICS at enrolment $\nabla$ $\nabla$                |                            |        |        |                                    |        |        |                                   |        |        |                  |
| Yes                                                      | 20                         | (83%)  |        | 11                                 | (92%)  |        | 56                                | (89%)  |        | 0.733            |
| No                                                       | 4                          | (17%)  |        | 1                                  | (8%)   |        | 7                                 | (11%)  |        |                  |
| Sputum eosinophilia (>3%) $\neq$                         |                            |        |        |                                    |        |        |                                   |        |        |                  |
| Yes                                                      | 1                          | (7%)   |        | 0                                  | (0%)   |        | 20                                | (43%)  |        | 0.011            |
| No                                                       | 13                         | (93%)  |        | 5                                  | (100%) |        | 26                                | (57%)  |        |                  |
| Blood eosinophilia (>=2%)                                |                            |        |        |                                    |        |        |                                   |        |        |                  |
| Yes                                                      | 6                          | (26%)  |        | 6                                  | (50%)  |        | 59                                | (94%)  |        | NA               |
| No                                                       | 17                         | (74%)  |        | 6                                  | (50%)  |        | 4                                 | (6%)   |        |                  |
| Bacteria present*                                        |                            |        |        |                                    |        |        |                                   |        |        |                  |
| Yes                                                      | 10                         | (56%)  |        | 4                                  | (44%)  |        | 30                                | (51%)  |        | 0.892            |
| No                                                       | 8                          | (44%)  |        | 5                                  | (56%)  |        | 29                                | (49%)  |        |                  |
| Virus present**                                          |                            |        |        |                                    |        |        |                                   |        |        |                  |
| Yes                                                      | 4                          | (24%)  |        | 0                                  | (0%)   |        | 10                                | (18%)  |        | 0.394            |
| No                                                       | 13                         | (76%)  |        | 9                                  | (100%) |        | 47                                | (82%)  |        |                  |

Ω Kruskal-Wallis test used for continuous variables, Fisher's Exact test for categorical variables

α reported as Mean(±SD), p value calculated from ANOVA

γ smoking status report based derived from ATS Q7A4

¥ICS use were coded as "Yes" if one of the following medications/inhalers was on the list (SYMBICORT, SERETIDE, QVAR, FOSTAIR, BECLOMETHASONE, BECLAMETHOSONE/FORMOTEROL, BECLOMETHASONE dipropionate, CLENIL, FLUTICASONE/SALMETEROL, BUDESONIDE/FORMOTEROL

≠Eosinophil% and Neutrophil% at baseline is reported. "Baseline" is equal to enrolment if good quality data (SQC<30) is present at enrolment, or the next (pre-exacerbation) stable visit with quality data within four months of enrolment.

ξ calculated as FEV1 at month 12 \* 100 / FEV1 at enrolment

€ calculated as (post broncho dilator BDFEV1 - preBD broncho dilator FEV1) / pre BDbroncho dilator FEV1 \* 100

\* Sputum sampling, measured by culture. Includes Haemophilus influenzae, Moraxella catarrhalis, Streptococcus pneumoniae, Staphylococcus aureus and Pseudomonas aeruginosa.

\*\* Sputum sampling, measured by PCR. Includes adenovirus, enterovirus, influenza, coronavirus, metapneumovirus, bocavirus, parainfluenza, RSV, and rhinovirus.

**Table E2.** Characteristic of those excluded and included in the longitudinal analyses at enrolment.

| Continuous variables                                  | Excluded |        |        | Included |        |        | P value $\Omega$ |
|-------------------------------------------------------|----------|--------|--------|----------|--------|--------|------------------|
|                                                       | N        | Median | (IQR)  | N        | Median | (IQR)  |                  |
| Age $\alpha$                                          | 28       | 67.6   | (7.80) | 99       | 66.6   | (8.85) | 0.673            |
| Smoking history (pack/years) $\alpha$                 | 28       | 44.2   | (17.7) | 99       | 52.0   | (30.3) | 0.263            |
| BMI                                                   | 28       | 28.4   | (7.57) | 99       | 26.7   | (6.39) | 0.080            |
| FFBM                                                  | 28       | 46.5   | (20.0) | 97       | 49.3   | (21.7) | 0.526            |
| WBC                                                   | 28       | 7.85   | (2.60) | 98       | 7.50   | (2.13) | 0.368            |
| Blood eosinophils (count)                             | 28       | 0.20   | (0.20) | 98       | 0.20   | (0.15) | 0.090            |
| Blood eosinophils (%)                                 | 28       | 2.16   | (3.11) | 98       | 3.05   | (3.01) | 0.102            |
| Blood neutrophils (count)                             | 28       | 4.95   | (1.75) | 98       | 4.80   | (1.60) | 0.277            |
| Fibrinogen                                            | 26       | 5.25   | (1.13) | 88       | 4.80   | (1.08) | 0.110            |
| CRP                                                   | 28       | 6.00   | (11.3) | 99       | 5.00   | (7.00) | 0.023            |
| Sputum eosinophils (%) $\neq$                         | 18       | 1.97   | (3.58) | 65       | 1.81   | (5.22) | 0.665            |
| Sputum neutrophils (%) $\neq$                         | 18       | 55.6   | (52.7) | 65       | 31.8   | (69.7) | 0.184            |
| FEV1 (%)                                              | 27       | 42.4   | (24.0) | 99       | 47.0   | (25.4) | 0.746            |
| $\Delta$ FEV1(% of baseline) $\xi$                    | 6        | 5.74   | N/A    | 79       | 4.93   | (21.6) | 0.864            |
| FEV1 reversibility (% of preBD FEV1) $\epsilon$       | 22       | 8.56   | (16.8) | 83       | 11.3   | (18.7) | 0.431            |
| KCO (%)                                               | 28       | 63.9   | (40.3) | 94       | 70.3   | (28.9) | 0.335            |
| TLCO(%)                                               | 28       | 50.8   | (26.1) | 94       | 59.0   | (29.1) | 0.105            |
| CAT                                                   | 27       | 20.0   | (13.0) | 99       | 16.0   | (10.0) | 0.096            |
| 6MWT (distance in meters)                             | 28       | 229    | (130)  | 97       | 324    | (169)  | 0.002            |
| Exact score                                           | 18       | 38.5   | (8.00) | 83       | 36.0   | (14.0) | 0.149            |
| Exacerbation rate in year before study                | 28       | 3.00   | (3.00) | 99       | 2.00   | (2.00) | 0.215            |
| Exacerbation rate in first year of study              | 28       | 3.99   | (6.70) | 99       | 1.99   | (3.02) | 0.078            |
| Eosinophilic exacerbation rate in first year of study | 28       | 1.34   | (3.32) | 99       | 0.99   | (1.99) | 0.412            |
| Follow up (years) in first year of study              | 28       | 0.58   | (0.57) | 99       | 1.01   | (0.02) | <0.001           |
| Categorical variables                                 | N        | (%)    |        | N        | (%)    |        |                  |
| Sex                                                   | Male     | 13     | (46%)  | 55       | (56%)  |        | 0.401            |
|                                                       | Female   | 15     | (54%)  | 44       | (44%)  |        |                  |
| Current smoker $\gamma$ $\mu$                         | Yes      | 11     | (39%)  | 43       | (43%)  |        | 0.829            |
|                                                       | No       | 17     | (61%)  | 56       | (57%)  |        |                  |
| Use of ICS at enrolment $\nu$                         | Yes      | 26     | (93%)  | 87       | (88%)  |        | 0.733            |
|                                                       | No       | 2      | (7%)   | 12       | (12%)  |        |                  |
| Sputum eosinophilia (>3%) $\neq$                      | Yes      | 6      | (33%)  | 21       | (32%)  |        | 1.000            |
|                                                       | No       | 12     | (67%)  | 44       | (68%)  |        |                  |
| Blood eosinophilia (>=2%)                             | Yes      | 15     | (54%)  | 71       | (72%)  |        | 0.068            |
|                                                       | No       | 13     | (46%)  | 27       | (28%)  |        |                  |
| Bacteria present*                                     | Yes      | 13     | (54%)  | 44       | (51%)  |        | 0.821            |
|                                                       | No       | 11     | (46%)  | 42       | (49%)  |        |                  |
| Virus present**                                       | Yes      | 4      | (20%)  | 14       | (17%)  |        | 0.747            |
|                                                       | No       | 16     | (80%)  | 69       | (83%)  |        |                  |

$\alpha$  reported as Mean( $\pm$ SD)

$\gamma$  smoking status report based derived from ATS Q7A4



¥ICS use were coded as “Yes” if one of the following medications/inhalers was on the list (SYMBICORT, SERETIDE, QVAR, FOSTAIR, BECLOMETHASONE, BECLAMETHOSONE/FORMOTEROL, BECLOMETHASONE dipropiionate, CLENIL, FLUTICASONE/SALMETEROL, BUDESONIDE/FORMOTEROL)

#Sputum eosinophil and neutrophil % at baseline is reported. “Baseline” is equal to enrolment if good quality data (SQC<30) is present at enrolment, or the next (pre-exacerbation) stable visit with quality data within four months of enrolment.

ξ calculated as  $FEV1 \text{ at month 12} * 100 / FEV1 \text{ at enrolment}$

€ calculated as  $(\text{post broncho dilator BDFEV1} - \text{preBD broncho dilatorFEV1}) / \text{pre BDbroncho dilator FEV1} * 100$

\* Sputum sampling, measured by culture. Includes Haemophilus influenzae, Moraxella catarrhalis, Streptococcus pneumoniae, Staphylococcus aureus and Pseudomonas aeruginosa.

\*\* Sputum sampling, measured by PCR. Includes adenovirus, enterovirus, influenza, coronavirus, metapneumovirus, bocavirus, parainfluenza, RSV, and rhinovirus.

**Table E3:** Seasonality<sup>μ</sup> of eosinophilic exacerbations in longitudinal phenotypes

|                             |                                | Summer |        | Winter |        |
|-----------------------------|--------------------------------|--------|--------|--------|--------|
|                             |                                | Median | (IQR)  | Median | (IQR)  |
| Predominantly eosinophilic  | Exacerbation rate              | 2.00   | (4.00) | 2.01   | (3.03) |
|                             | Eosinophilic exacerbation rate | 1.93   | (3.93) | 2.00   | (2.02) |
| Intermittently eosinophilic | Exacerbation rate              | 0.00   | (2.00) | 2.00   | (3.53) |
|                             | Eosinophilic exacerbation rate | 0.00   | (0.00) | 0.00   | (1.99) |
| Rarely eosinophilic         | Exacerbation rate              | 1.98   | (3.99) | 3.73   | (4.00) |
|                             | Eosinophilic exacerbation rate | 0.00   | (0.00) | 0.00   | (1.94) |
| OVERALL                     | Exacerbation rate              | 1.99   | (3.99) | 2.01   | (2.05) |
|                             | Eosinophilic exacerbation rate | 0.00   | (2.00) | 0.00   | (2.00) |

μ Summer season defined as April-September, Winter as October-March. 12 monthly rates are presented for all exacerbations, and for eosinophilic exacerbations.

**Table E4:** Odds\* of eosinophilic inflammation at exacerbation in summer compared to winter<sup>μ</sup>

|                                                      | N of total exacerbations | N of exacerbations in Summer | N of exacerbations in Winter | N of individuals | Odds Ratio | 95% CI       | p value |
|------------------------------------------------------|--------------------------|------------------------------|------------------------------|------------------|------------|--------------|---------|
| Exacerbations with blood eosinophilia ( $\geq 2\%$ ) | 338                      | 132                          | 206                          | 104              | 2.65       | (1.50; 4.68) | 0.001   |
| Exacerbations with sputum eosinophilia ( $> 3\%$ )   | 218                      | 88                           | 130                          | 91               | 1.94       | (0.82; 4.52) | 0.129   |

\*Conditional logistic regression including subject as a random effect

<sup>μ</sup> Summer season defined as April-September, Winter as October-March

**Figure E1**

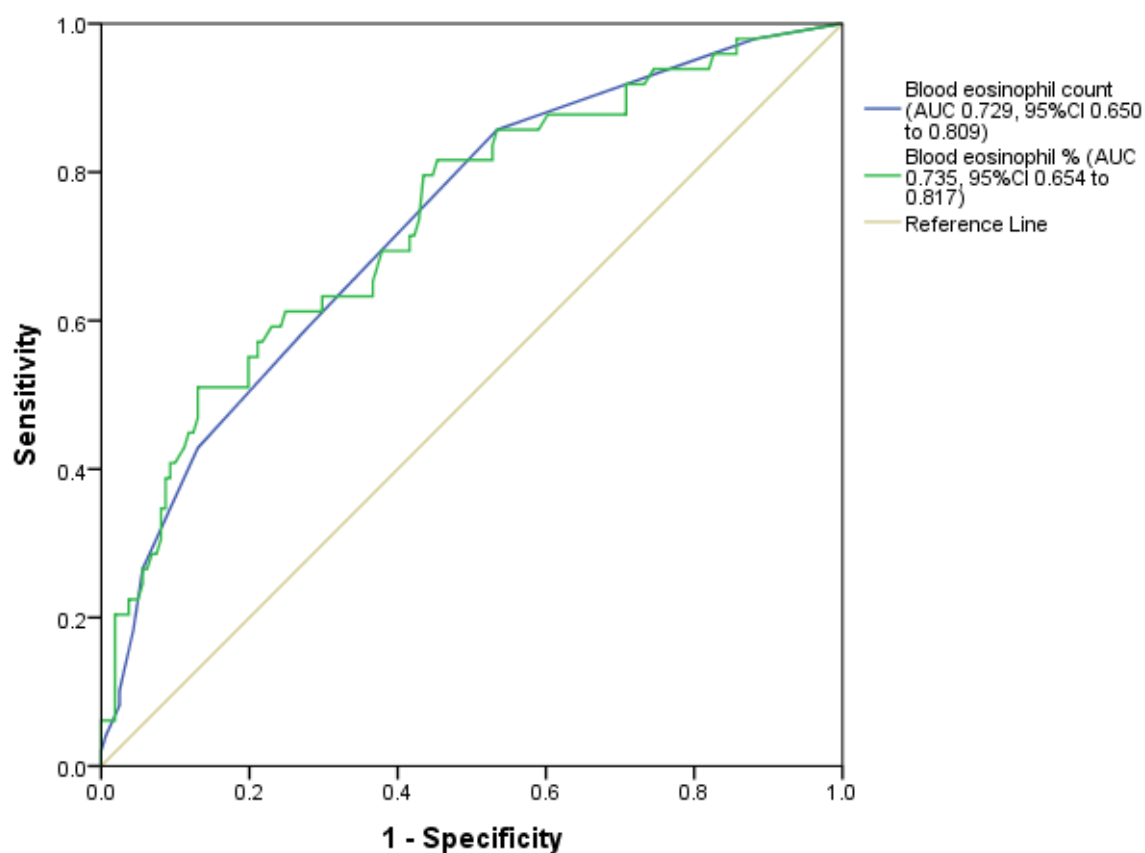

**Figure E1** Receiver operating characteristic for blood eosinophil (count & %) at exacerbation predicting sputum eosinophilia >3% (n=210) at exacerbation. At exacerbations blood eosinophils  $\geq 2\%$  cut point was 79.6% sensitive and 55.3% specific in identifying sputum eosinophils (>3%).
