# Supplementary material
Source: HighWire-hosted journal article supplement (https://erj.ersjournals.com/content/50/4/1700853)

Month of exacerbation visit \* Eosinophils categorial (>=2% in blood) [labo] Crosstabulation Count

| Month of e | Eosinophils categorica Total |            |     |
|------------|------------------------------|------------|-----|
|            | No (<2%)                     | Yes (>=2%) |     |
| Jan        | 32                           | 15         | 47  |
| Feb        | 15                           | 8          | 23  |
| Mar        | 14                           | 15         | 29  |
| Apr        | 13                           | 12         | 25  |
| May        | 8                            | 20         | 28  |
| Jun        | 7                            | 10         | 17  |
| Jul        | 5                            | 14         | 19  |
| Aug        | 8                            | 15         | 23  |
| Sep        | 9                            | 11         | 20  |
| Oct        | 19                           | 13         | 32  |
| Nov        | 15                           | 18         | 33  |
| Dec        | 25                           | 17         | 42  |
| Total      | 170                          | 168        | 338 |

Exacerbati: All exacerbations with blood data available

|     |    |    |
|-----|----|----|
| Jan | 15 | 47 |
| Feb | 8  | 23 |
| Mar | 15 | 29 |
| Apr | 12 | 25 |
| May | 20 | 28 |
| Jun | 10 | 17 |
| Jul | 14 | 19 |
| Aug | 15 | 23 |
| Sep | 11 | 20 |
| Oct | 13 | 32 |
| Nov | 18 | 33 |
| Dec | 17 | 42 |

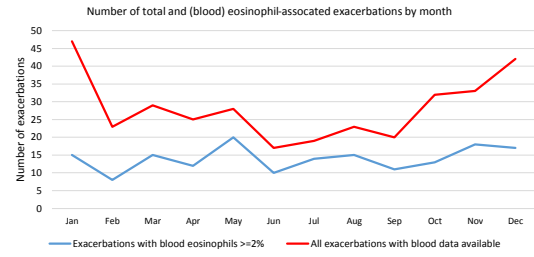

Blood eosinophils >=2%

|     |       |
|-----|-------|
| Jan | 31.91 |
| Feb | 34.78 |
| Mar | 51.72 |
| Apr | 48.00 |
| May | 71.43 |
| Jun | 58.82 |
| Jul | 73.68 |
| Aug | 65.22 |
| Sep | 55.00 |
| Oct | 40.63 |
| Nov | 54.55 |
| Dec | 40.48 |

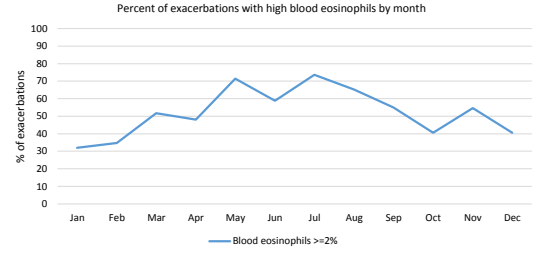

Supplement: inline-supplementary-material-2 [file inline-supplementary-material-2.pdf]
